# Supplementary material
Source: PubMed Central journal article supplement (PMC3190783)
Supplement: supp_M111.286823_jbc.M111.286823-1.pdf [file supp_M111.286823_jbc.M111.286823-1.pdf]

## Supplementary Videos

Video S1. CLC12N2-Nec cells were treated with MDP (100 ng/ml). Starting 3 h after the MDP addition, images were captured every 7.5 s for 25 min and are displayed at 500 frames/ min.

Video S2. CLC12N2-Apo cells were treated with MDP (100 ng/ml). Starting 3 h after the MDP addition, images were captured every minute for 3 h and are displayed at 500 frames/min.

## Supplementary Figures

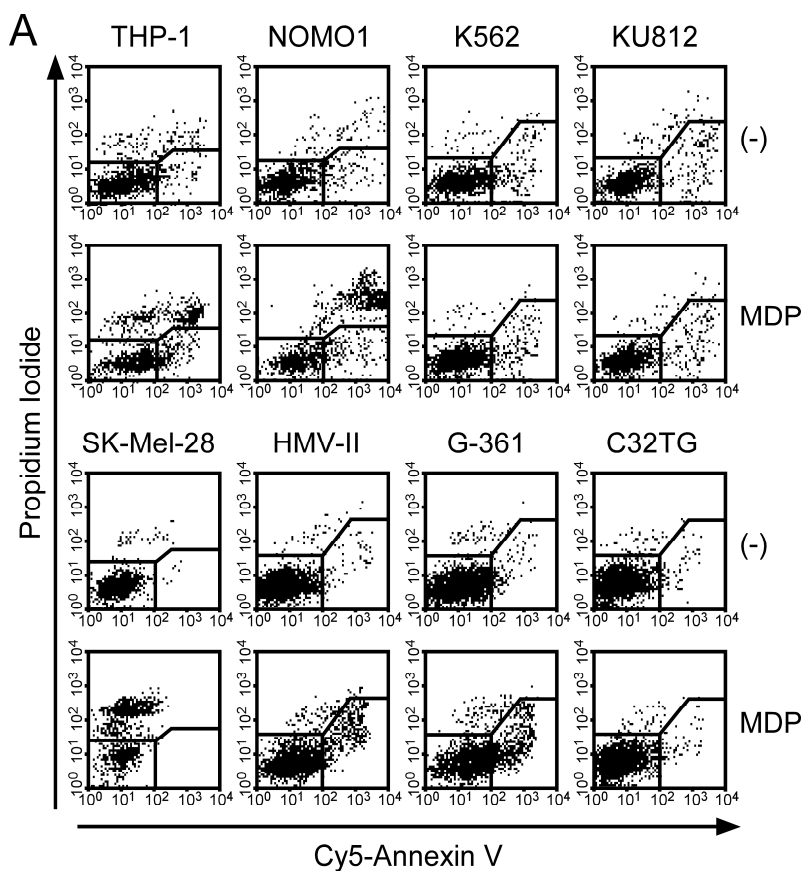

**FIGURE S1. ASC activation induces apoptosis or necrosis.** *A*, Two-dimensional (propidium iodide and Cy5-annexin V) staining profiles of the cells described in Fig. 1C. *B*, Time course of the staining profiles of apoptosis-type cells after MDP addition. *A* and *B*, MDP-treated THP-1, NOMO-1, and SK-Mel-28 cells exhibited increased PI staining preceding or occurring simultaneously with increased Cy5-Annexin V staining. Therefore, the PI(+) Cy5-Annexin V(+) cells were considered necrotic cells. On the other hand, MDP-treated HMV-II and G-361 cells exhibited an increase in Cy5-Annexin V staining that preceded PI staining. Thus, the PI(+) Cy5-Annexin V(+) cells were considered apoptotic cells. The morphology of the dying cells (Fig. 1B) and the fact that pretreatment with Z-IETD-FMK inhibited the development of PI(+) Cy5-Annexin V(+) cells from the latter cell lines but not from the former cell lines (Fig. 2) support this evaluation.

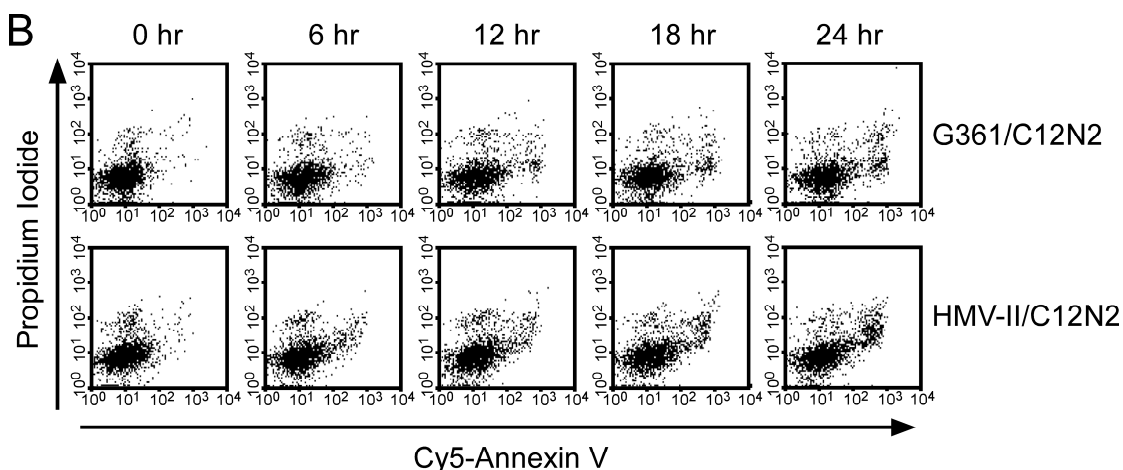

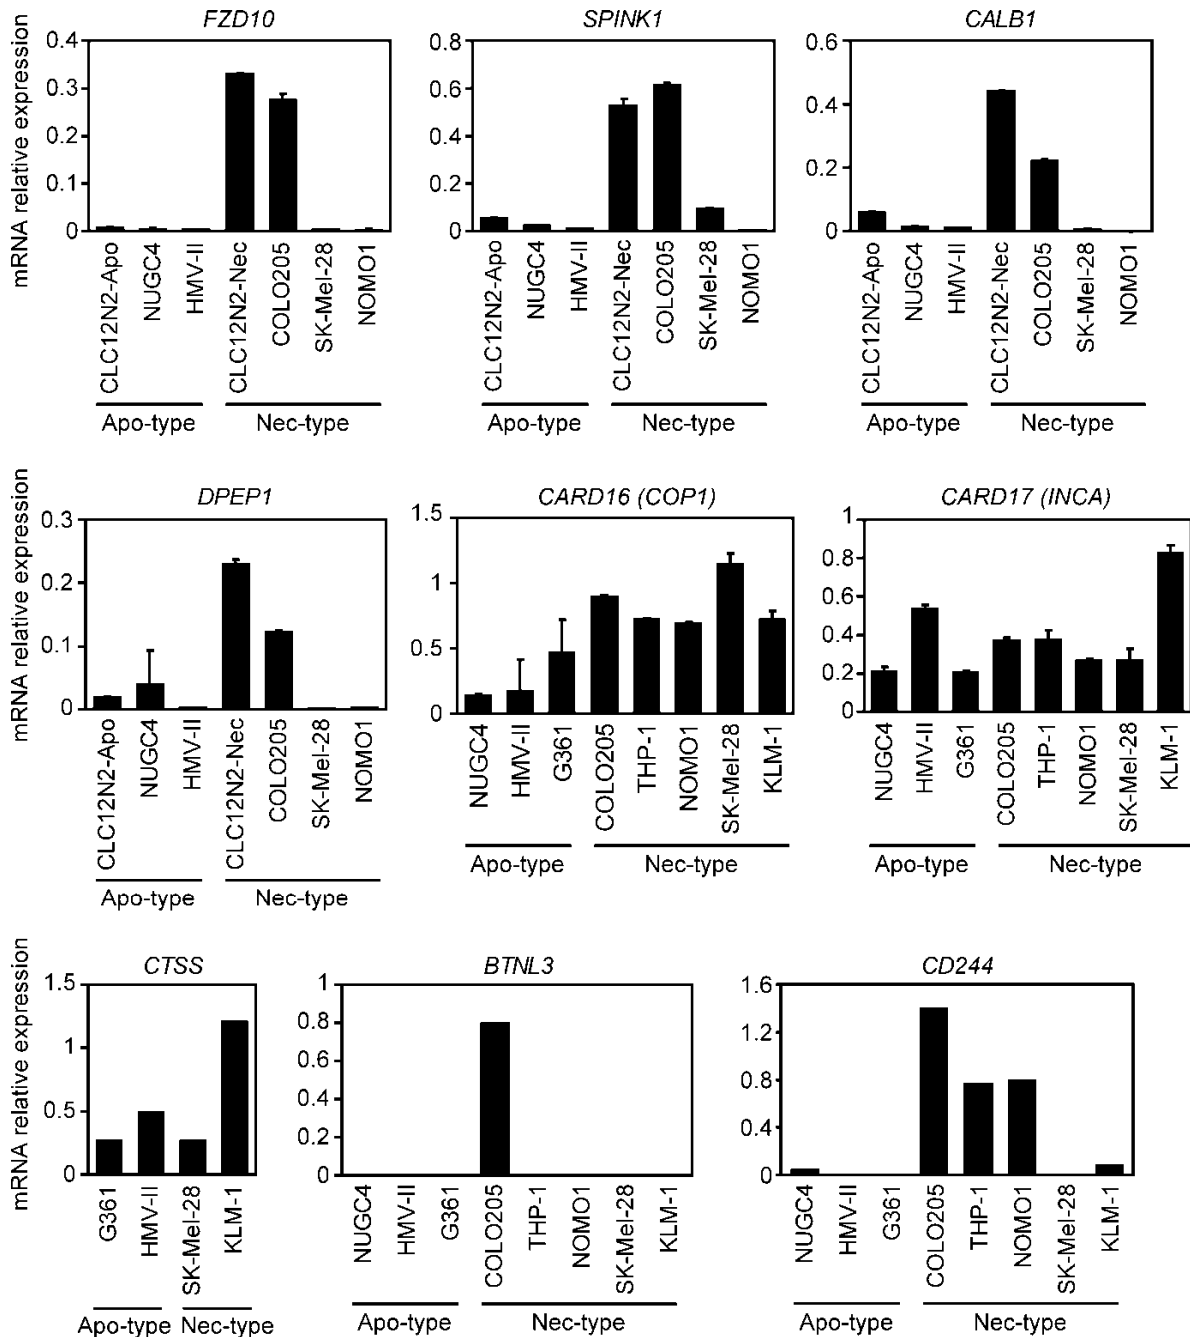

**FIGURE S2. The mRNA expression levels in apoptosis-type and necrosis-type cell lines of the genes listed in the upper panel of Fig. 1C.** The mRNA levels of the indicated genes were analyzed by real-time PCR. Relative mRNA expression levels normalized to that of *ACTB* ( $\beta$ -Actin) are shown. The primer sequences are shown in supplementary Table S1. *FZD10*, frizzled homolog 10; *SPINK1*, serine peptidase inhibitor, Kazal type 1; *CALB1*, calbindin 1; *DPEP1*, dipeptidase 1; *CARD16*, caspase recruitment domain family, member 16 (also known as *COP1*); *CARD17*, caspase recruitment domain family, member 17 (also known as *INCA*); *CTSS*, cathepsin S; *BTNL3*, butyrophilin-like 3; *CD244*, CD244 molecule, natural killer cell receptor 2B4.

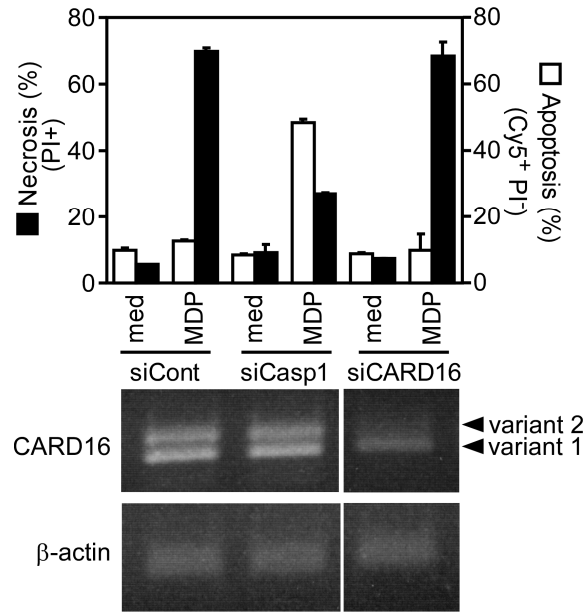

**FIGURE S3. *CARD16* knockdown in CLC12N2-Nec cells does not convert the cell death mode.** CLC12N2-Nec cells were transfected with control, caspase-1-targeting, or *CARD16*-targeting siRNA (Invitrogen, HSS174333) on days 0, 3, and 6. On day 9, the cells were treated with MDP (100 ng/ml) for 12 h, and the proportions of apoptotic and necrotic cells were determined by flow cytometry as described in Fig. 1B. The expression levels of *CARD16* and *ACTB* ( $\beta$ -actin) on day 8 were examined by RT-PCR (lower panels). The following primers were used for PCR: *CARD16*, 5'-GCCATGGCCGACAAGGT-3' and 5'-ACCTAGGAAGGAAGTACTATTTGAG-3';  $\beta$ -actin, 5'-TCCCTGGAGAAGAGCTACGA-3' and 5'-AAAGCCATGCCAATCTCATC-3'.

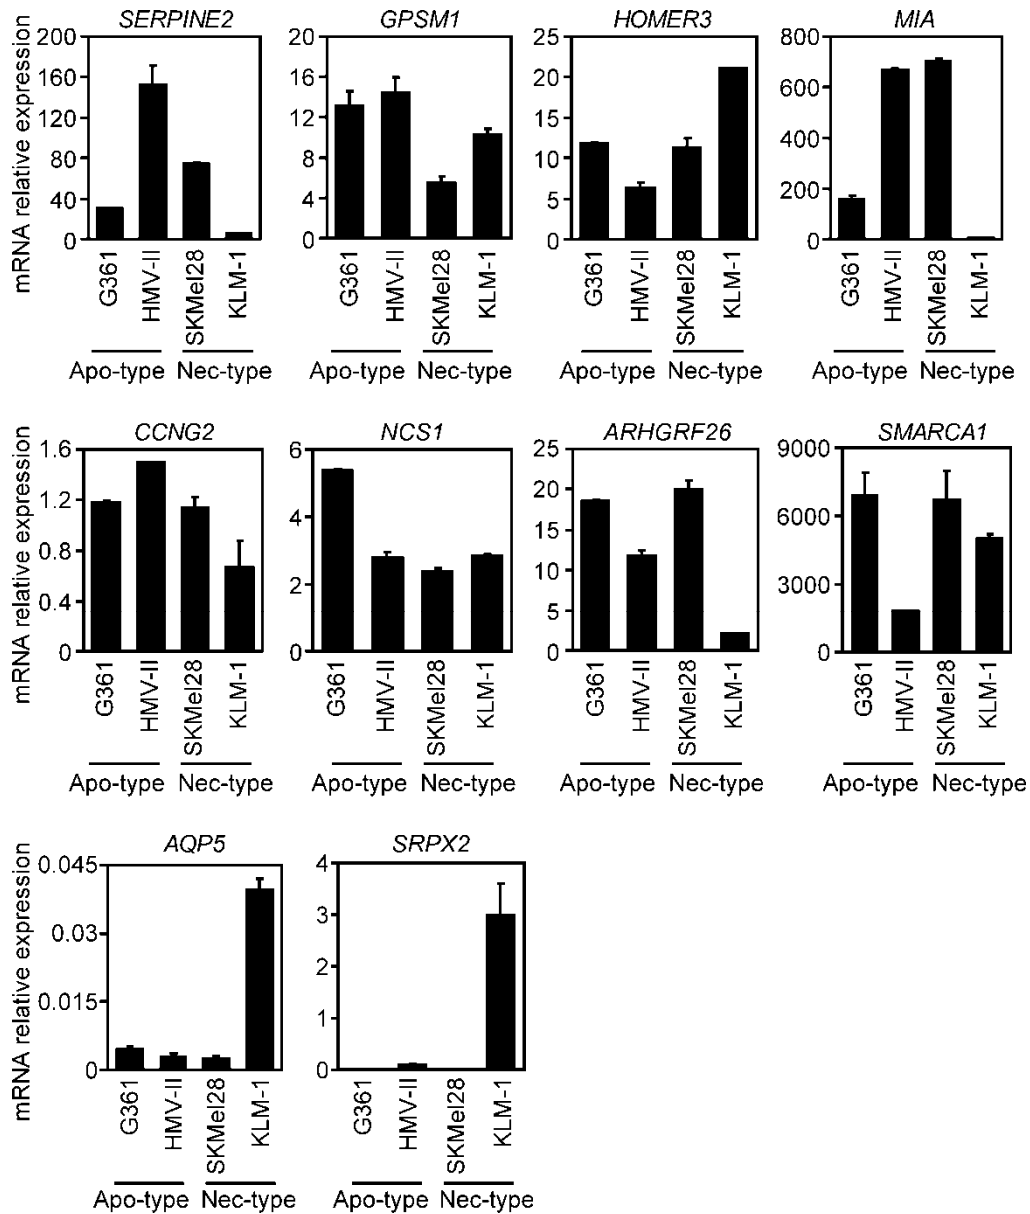

FIGURE S4. The mRNA expression levels in apoptosis-type and necrosis-type cell lines of the genes listed in the lower panel of Fig. 1C. The mRNA levels of the indicated genes were analyzed by real-time PCR. Relative mRNA expression levels normalized to that of *ACTB* ( $\beta$ -Actin) are shown. The primer sequences are shown in supplementary Table S1. *SERPINE2*, serpin peptidase inhibitor, clade E, member 2; *GPSM1*, G-protein signaling modulator 1; *HOMER3*, homer homolog 3; *MIA*, melanoma inhibitory activity; *CCNG2*, cyclin G2; *NCS1*, neuronal calcium sensor 1; *ARHGRF26*, Rho guanine nucleotide exchange factor 26; *SMARCA1*, SWI/SNF related, matrix associated, actin dependent regulator of chromatin, subfamily a, member 1; *AQP5*, aquaporin 5; *SRPX2*, sushi-repeat-containing protein, X-linked 2.

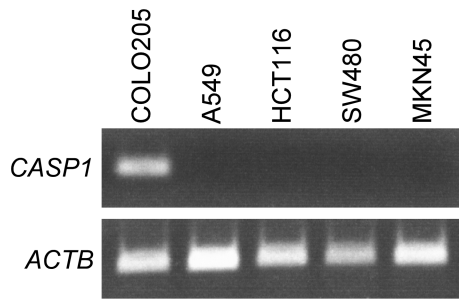

FIGURE S5. **Apoptosis-type cells do not express caspase-1.** RT-PCR was used to examine caspase-1 and  $\beta$ -actin mRNA expression in four human cancer cell lines (A549, HCT116, SW480, MKN45) that exhibit apoptosis in response to ASC activation by NLRC4-mimicry.

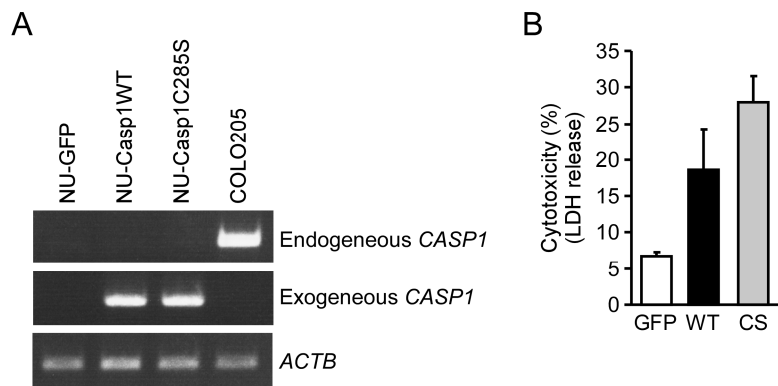

FIGURE S6. **The catalytic activity of caspase-1 is not required for ASC-mediated necrosis.** *A*, Total RNA was isolated from the indicated cell lines, and the mRNA levels of endogenous and exogenous caspase-1 and  $\beta$ -actin were detected by RT-PCR. *B*, NU-GFP, NU-Casp1WT, and NU-Casp1C285S cells were cultured with MDP (1000 ng/ml) for 6 h. Cytotoxicity was assessed by LDH release assay.

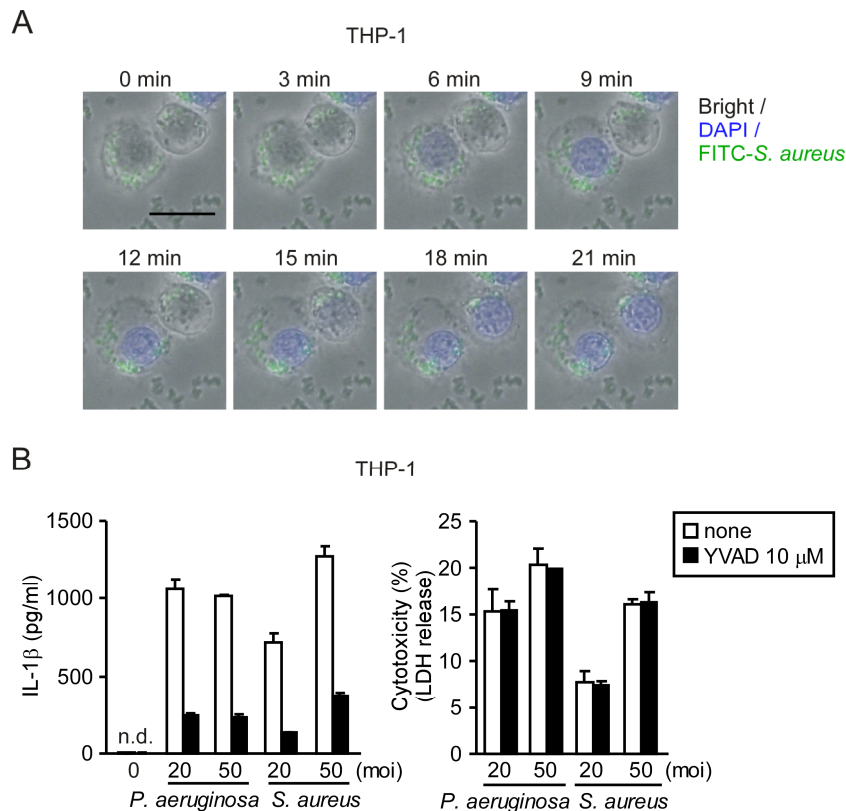

FIGURE S7. **Ac-YVAD-CMK inhibits the IL-1 $\beta$  release but not the necrosis induced by bacterial infection in THP-1 cells.** *A*, THP-1 cells were treated with PMA (10 ng/ml) for 12 h to allow cells to adhere to the culture plate, and the cells were then infected with FITC-labeled *S. aureus* (moi 50) in the presence of 4',6-diamidino-2-phenylindole (DAPI). Time-lapse images were recorded every 3 min beginning 3 h after infection. Scale bar, 20  $\mu$ m. Nuclear staining with DAPI and the swelling of *S. aureus*-infected cells indicates that *S. aureus* induced necrosis in THP-1 cells. *B*, THP-1 cells were pretreated with Ac-YVAD-CMK (10  $\mu$ M) for 1 h, and then infected with *S. aureus* for 2 h or with *P. aeruginosa* for 4 h. The culture supernatants were examined for LDH and IL-1 $\beta$  release.

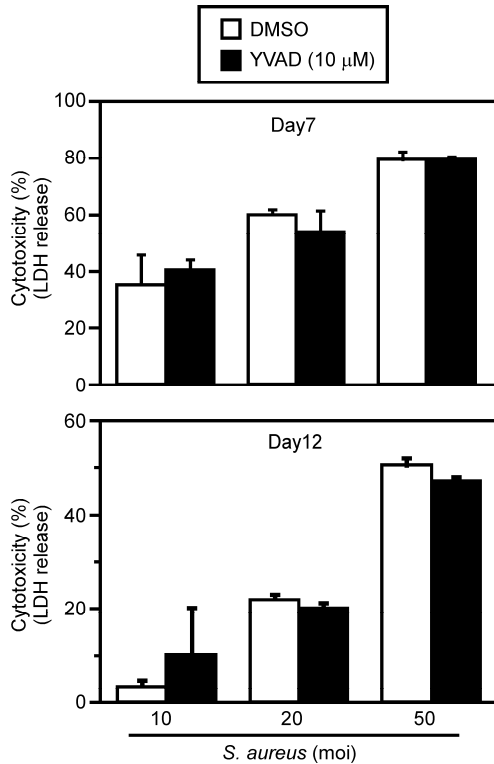

**FIGURE S8. Long-term inhibition of caspase-1 activity does not suppress *S. aureus*-induced necrosis of NOMO-1 cells.** NOMO-1 cells were treated with Ac-YVAD-CMK for 7 or 12 days. Cells were then infected with *S. aureus* at the indicated moi in the presence of Ac-YVAD-CMK for 4 h. Cytotoxicity was assessed by LDH release assays.

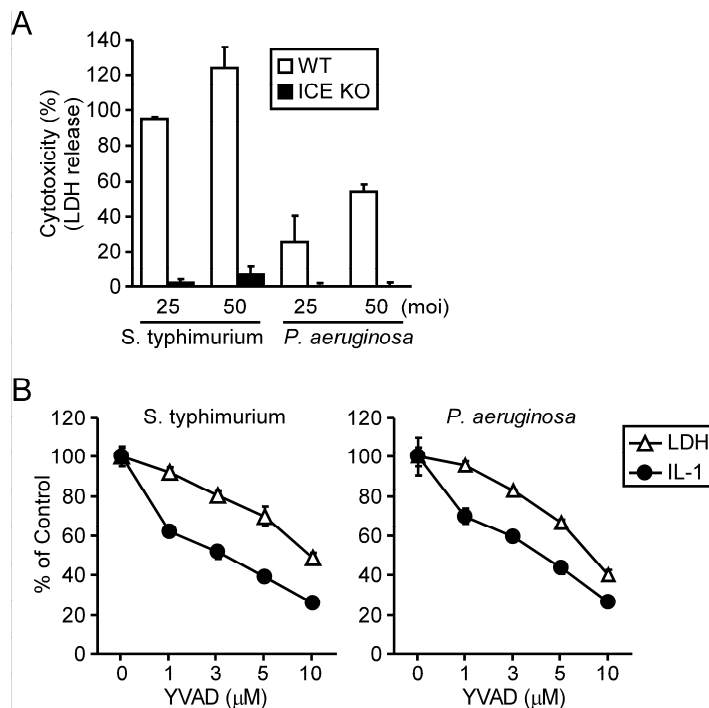

**FIGURE S9. Caspase-1 catalytic activity seems to be required for pyroptosis of mouse macrophages.** *A*, Thioglycollate-induced peritoneal macrophages were prepared from wild-type (WT, Caspase-1<sup>+/+</sup>) or ICE KO (Caspase-1<sup>-/-</sup>) mice. The macrophages were primed with LPS (100 ng/ml) for 12 h, and then infected with *Salmonella* (*S.*) *typhimurium* (ATCC 14028s) or *P. aeruginosa* for 2 h. *B*, Thioglycollate-induced peritoneal macrophages from wild-type mice were primed with LPS (100 ng/ml) for 4 h. The LPS-primed macrophages were pre-treated with the indicated concentrations of Ac-YVAD-CMK for 1 h, and then infected with *S. typhimurium* or *P. aeruginosa* for 1 h. LDH release and IL-1 $\beta$  production were analyzed as described in Fig. 7.

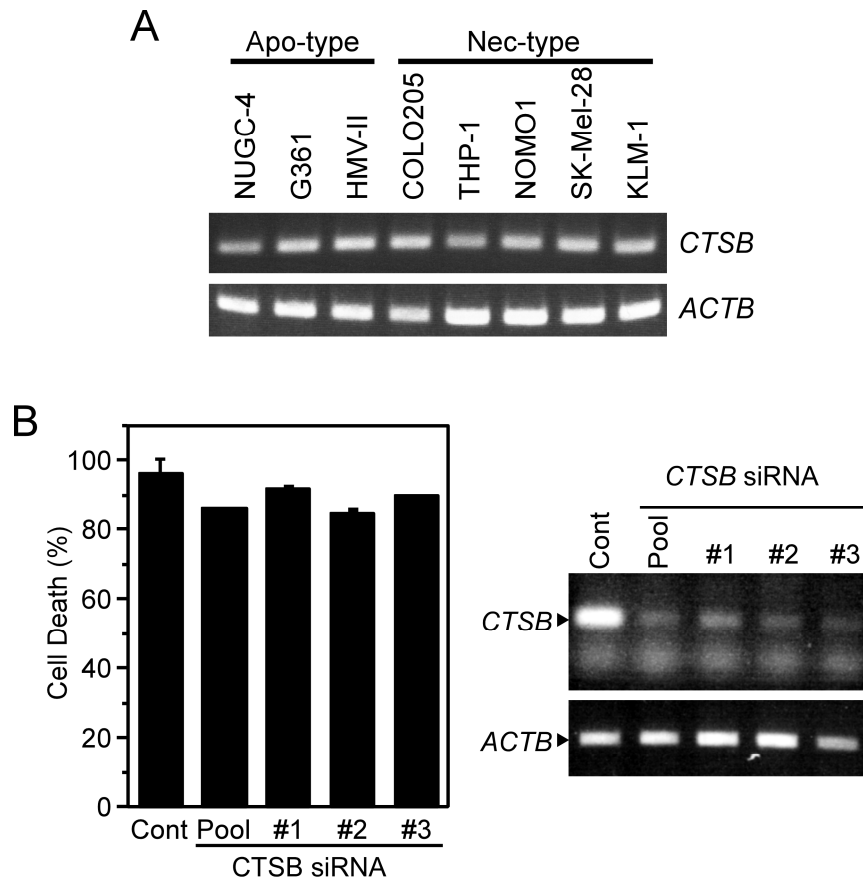

FIGURE S10. Cathepsin B may not be the target of CA-074Me in the inhibition of ASC-mediated necrosis. *A*, Total RNA was extracted from the indicated cell lines, and the expression of cathepsin B mRNA (*CTSB*) was examined by RT-PCR analysis. *B*, NOMO1-C12N2 cells were transfected with 20 nM of a control siRNA, a pool of four *CTSB* siRNAs (Dharmacon, L-004266-00), or three individual *CTSB* siRNAs (invitrogen, HSS102475-7). Forty eight hours later, cells were treated with MDP (300 ng/ml) for 6 h. Cell death was assessed by WST-1 assays (left panel). Knockdown of cathepsin B mRNA was confirmed by RT-PCR analyses (right panels).

## Supplementary table

**Table S1.** The primer sequences<sup>1)</sup> used in Fig. S2 and S4.

| Gene            | Sense                     | Antisense                 |
|-----------------|---------------------------|---------------------------|
| <i>FZD10</i>    | CGGTGAAGACCATCCTGATCC     | CAGCTTGTCCGTGTTCTCG       |
| <i>CD244</i>    | AAGCCACACCCTGAATCTCAC     | CCAAAAACGGCCAAAATCTGAA    |
| <i>SPINK1</i>   | AGTCTATCTGGTAACTGGAGC     | ACACGCATTTCATTGGGATAAGT   |
| <i>CALB1</i>    | AGGGAATCAAATGTGTGGGAAA    | TCCTTCAGTAAAGCATCCAGTTC   |
| <i>DPEP1</i>    | AGAGCCCCGGTCATCTTCA       | CCTTGTTGGTGCAGGAAATGTA    |
| <i>CARD16</i>   | TGCAGAGGTGCCATGTTTCCAG    | TTTATGCAAGGGGAGCAGCAGAAG  |
| <i>CARD17</i>   | AATGGCTTACTGGGTGAATTATTGG | TGTGATGCAAATTTGGCATGCTGGA |
| <i>CTSS</i>     | ATGAAACGGCTGGTTTGTGTG     | TGCTCCAGGTTGTGAAGCATC     |
| <i>BTNL3</i>    | GGGGCGTGTCTCTCTAAGG       | CGTCAACATATCCCACGATGGA    |
| <i>SERPINE2</i> | ACGCCGTGTTTGTTAAGAATGC    | CGTTGACGAGGACCAGTCT       |
| <i>GPSM1</i>    | GGAGCCGGGCCTATCTCTAAA     | CTCTTGCTGCCAGTAAGCATC     |
| <i>HOMER3</i>   | GGCGAGGAAAACTGTTCCG       | ACAACATCTTCTTTAGCCGCTC    |
| <i>MIA</i>      | GTCAGGGGTGGTCCTATGC       | GGTCAGGAATCGGCAGTCG       |
| <i>CCNG2</i>    | TGCCTAGCCGAGTATTCTTCT     | TGTTTGTGCCACTTTGAAGTTG    |
| <i>NCS1</i>     | TTCAAGCTCTACGACTTGGACA    | GCTCCACGGTATTCCCCAC       |
| <i>ARHGEF26</i> | CCGTGGTTTTGAGTACAAACAGC   | CGCACCTTGAGGAGTCTCTTG     |
| <i>SMARCA1</i>  | GATGCGACCGCCACTATCG       | AGATTTAGGCGCTTTAGCAGC     |
| <i>AQP5</i>     | CTGTCCATTGGCCTGTCTGTC     | GGCTCATACTGCCTTTGATG      |
| <i>SRPX2</i>    | GATGAGATGCCACGCACTACC     | TCTTCCATGCAGATTCCGGCTG    |

1) These primer sequences, with the exception of those for *CARD16* and *CARD17*, were obtained from PrimerBank (<http://pga.mgh.harvard.edu/primerbank/>).
